# Supplementary material
Source: publisher figshare collection journal article supplement (https://asha.figshare.com/articles/dataset/_/19787728)
Supplement: Supplementary file 1 [file 1]

**Supplemental Material S4.** Assessment practices for everyday living skills.

|                                  |                     | Overall Breakdown by Respondent Setting |                             |                        |                         |                 |                  |
|----------------------------------|---------------------|-----------------------------------------|-----------------------------|------------------------|-------------------------|-----------------|------------------|
| Domains and Subdomains           | Overall<br>(N = 99) | Acute<br>(n = 4)                        | Inpatient Rehab<br>(n = 11) | Outpatient<br>(n = 33) | Home Health<br>(n = 16) | SNF<br>(n = 29) | Other<br>(n = 6) |
| <i>Interview</i>                 | 42 (42%)            | 2                                       | 4                           | 19                     | 5                       | 9               | 3                |
| Caregiver                        | 27                  | 1                                       | 2                           | 15                     | 4                       | 5               | *                |
| Patient                          | 21                  | 1                                       | 1                           | 12                     | 4                       | 3               | *                |
| Other Team Members               | 10                  | *                                       | 2                           | 3                      | 1                       | 4               | *                |
|                                  |                     |                                         |                             |                        |                         |                 |                  |
| <i>Informal Tasks</i>            | 35 (35%)            | 1                                       | 7                           | 8                      | 5                       | 13              | 1                |
| Medication Management            | 8                   | *                                       | 2                           | *                      | 1                       | 5               | *                |
| Financial Management             | 7                   | *                                       | 2                           | 2                      | *                       | 3               | *                |
| Cooking Tasks                    | 5                   | *                                       | *                           | 3                      | *                       | 2               | *                |
| Safety Tasks                     | 4                   | *                                       | 1                           | 1                      | 1                       | 1               | *                |
| Personal Care Tasks              | 3                   | *                                       | 1                           | *                      | *                       | 2               | *                |
| Appointments/Scheduling          | 2                   | *                                       | *                           | *                      | 1                       | 1               | *                |
| Telephone/Email Tasks            | 2                   | *                                       | *                           | *                      | *                       | 2               | *                |
| Shopping Tasks                   | 2                   | *                                       | *                           | *                      | 1                       | 1               | *                |
|                                  |                     |                                         |                             |                        |                         |                 |                  |
| <i>Observation</i>               | 24 (24%)            | *                                       | 1                           | 5                      | 4                       | 12              | 2                |
|                                  |                     |                                         |                             |                        |                         |                 |                  |
| <i>Performance-Based Measure</i> | 19 (19%)            | *                                       | 2                           | 10                     | 2                       | 4               | 1                |
| ALFA                             | 11                  | *                                       | 2                           | 7                      | *                       | 2               | *                |
| F-STAC                           | 4                   | *                                       | 1                           | 2                      | 1                       | *               | *                |
| Allen’s                          | 2                   | *                                       | *                           | *                      | *                       | 2               | *                |
| CADL                             | 2                   | *                                       | *                           | 1                      | *                       | *               | 1                |
| AMPS                             | 1                   | *                                       | *                           | *                      | 1                       | *               | *                |
| CLQT                             | 1                   | *                                       | *                           | 1                      | *                       | *               | *                |
| RIPA                             | 1                   | *                                       | *                           | 1                      | *                       | *               | *                |
| SCCAN                            | 1                   | *                                       | 1                           | *                      | *                       | *               | *                |
| TFLA                             | 1                   | *                                       | 1                           | *                      | *                       | *               | *                |
| Woodcock Johnson                 | 1                   | *                                       | *                           | 1                      | *                       | *               | *                |
|                                  |                     |                                         |                             |                        |                         |                 |                  |
| <i>Informal Survey</i>           | 16 (16%)            | 1                                       | 2                           | 8                      | 2                       | 2               | 1                |

|                           |          |   |   |   |   |   |   |
|---------------------------|----------|---|---|---|---|---|---|
|                           |          |   |   |   |   |   |   |
| <i>Team Collaboration</i> | 12 (12%) | 1 | 3 | 3 | 1 | 4 | * |
|                           |          |   |   |   |   |   |   |
| <i>Published Survey</i>   | 6 (6%)   | * | * | 5 | 1 | * | * |
| Lawton Scale              | 2        | * | * | 2 | * | * | * |
| FIM                       | 1        | * | * | * | 1 | * | * |
| IQCODE                    | 1        | * | * | 1 | * | * | * |
| MMQ                       | 1        | * | * | 1 | * | * | * |
| ASHA FACS                 | 1        | * | * | 1 | * | * | * |

*Note.* This table summarizes the qualitative analysis of SLP responses to section II, question 9a; SNF= Skilled Nursing Facility; ALFA = Assessment of Language Related Functional Activities; F-STAC = Functional Standardized Touchscreen Assessment of Cognition; Allen’s = Allen’s Cognitive Level Screen Assessment; CADL = Communication Activities of Daily Living; CLQT = Cognitive Linguistic Quick Test; ASHA FACS = American Speech-Language-Hearing Association Functional Assessment of Communication Skills for Adults; RIPA = Ross Information Processing Assessment; SCCAN = Scales of Cognitive and Communicative Ability for Neurorehabilitation; TFLS = Texas Functional Living Scale; FIM = Functional Independence Measure; IQCODE = Informant Questionnaire on Cognitive Decline in the Elderly; AMPS = Activity Management Profile Scale; MMQ = Multifactorial Memory Questionnaire.
