# Supplementary material
Source: publisher figshare collection journal article supplement (https://asha.figshare.com/articles/dataset/_/19787728)
Supplement: Supplementary file 2 [file 1]

## Supplemental Material S7. General clinical needs.

| Domains and Subdomains        | Overall<br>(N = 100) | Overall Breakdown by Respondent Setting |                             |                        |                         |                 |                  |
|-------------------------------|----------------------|-----------------------------------------|-----------------------------|------------------------|-------------------------|-----------------|------------------|
|                               |                      | Acute Care<br>(n = 6)                   | Inpatient Rehab<br>(n = 12) | Outpatient<br>(n = 38) | Home Health<br>(n = 17) | SNF<br>(n = 22) | Other<br>(n = 5) |
| <i>Assessment Needs</i>       | 61 (61%)             | 4                                       | 7                           | 21                     | 10                      | 17              | 2                |
| Better Tests                  | 25                   | 2                                       | 2                           | 8                      | 3                       | 9               | 1                |
| Standardization               | 18                   | 2                                       | 2                           | 3                      | 3                       | 7               | 1                |
| Sensitivity                   | 11                   | *                                       | 1                           | 5                      | 1                       | 4               | *                |
| More Feasible                 | 6                    | *                                       | 1                           | 1                      | 1                       | 3               | *                |
| Time                          | 4                    | *                                       | *                           | 1                      | 1                       | 1               | *                |
| Cost                          | 3                    | *                                       | 1                           | *                      | 1                       | 1               | *                |
| Digital                       | 1                    | *                                       | 1                           | *                      | *                       | *               | *                |
| Functional Measures           | 24                   | 2                                       | 1                           | 9                      | 4                       | 7               | 1                |
| Strategy Measures             | 3                    | *                                       | *                           | 2                      | *                       | 1               | *                |
| PROM                          | 1                    | *                                       | *                           | 1                      | *                       | *               | *                |
|                               |                      |                                         |                             |                        |                         |                 |                  |
| <i>Unsure</i>                 | 18 (18%)             | 1                                       | 4                           | 6                      | 3                       | 3               | 1                |
|                               |                      |                                         |                             |                        |                         |                 |                  |
| <i>Treatment Needs</i>        | 15 (15%)             | 2                                       | 1                           | 5                      | 1                       | 6               | *                |
| Functional                    | 6                    | 2                                       | *                           | 2                      | *                       | 2               | *                |
| Standardized                  | 3                    | *                                       | *                           | 2                      | *                       | 1               | *                |
| More Feasible                 | 2                    | *                                       | 1                           | *                      | 1                       | *               | *                |
| Time                          | 1                    | *                                       | *                           | *                      | 1                       | *               | *                |
| Cost                          | 1                    | *                                       | 1                           | *                      | *                       | *               | *                |
| Digital                       | 1                    | *                                       | 1                           | *                      | *                       | *               | *                |
| Compensatory                  | 1                    | *                                       | *                           | *                      | *                       | 1               | *                |
|                               |                      |                                         |                             |                        |                         |                 |                  |
| <i>Goal Development</i>       | 13 (13%)             | *                                       | 2                           | 6                      | 2                       | 2               | 1                |
| <i>Educational Tools</i>      | 8 (8%)               | 1                                       | 1                           | 3                      | 2                       | 1               | *                |
| <i>More Functional NOS</i>    | 2 (2%)               | *                                       | 1                           | 1                      | *                       | *               | *                |
| <i>Standardized Tools NOS</i> | 2 (2%)               | 1                                       | *                           | 1                      | *                       | *               | *                |
| <i>Sensitive Tools NOS</i>    | 1 (1%)               | *                                       | 1                           | *                      | *                       | *               | *                |
| <i>Cost NOS</i>               | 1 (1%)               | *                                       | *                           | *                      | 1                       | *               | *                |
| <i>Time NOS</i>               | 1 (1%)               | 1                                       | *                           | *                      | *                       | *               | *                |

*Note.* This table summarizes the qualitative analysis of SLP responses to section II, question 18; SNF = Skilled Nursing Facility; PROM = Patient-Reported Outcome Measure; NOS = Not Otherwise Specified.
