# Supplementary material
Source: publisher figshare collection journal article supplement (https://asha.figshare.com/articles/dataset/_/19787728)
Supplement: Supplementary file 3 [file 1]

**Supplemental Material S6.** Treatments for MCI or early-stage dementia from AD.

| Domains and Subdomains     | Overall Breakdown by Respondent Setting |                          |                                     |                                |                                 |                         |                          |
|----------------------------|-----------------------------------------|--------------------------|-------------------------------------|--------------------------------|---------------------------------|-------------------------|--------------------------|
|                            | Overall<br>( <i>N</i> = 123)            | Acute<br>( <i>n</i> = 7) | Inpatient Rehab<br>( <i>n</i> = 15) | Outpatient<br>( <i>n</i> = 48) | Home Health<br>( <i>n</i> = 16) | SNF<br>( <i>n</i> = 29) | Other<br>( <i>n</i> = 8) |
| <i>Named Interventions</i> | 115 (93%)                               | 6                        | 15                                  | 43                             | 15                              | 28                      | 8                        |
| Compensatory Strategies    | 89                                      | 4                        | 15                                  | 34                             | 9                               | 20                      | 7                        |
| External Aids              | 61                                      | 4                        | 10                                  | 24                             | 5                               | 13                      | 5                        |
| Memory/Communication Book  | 17                                      | 2                        | 2                                   | 4                              | 2                               | 5                       | 2                        |
| Calendar                   | 12                                      | 1                        | 1                                   | 6                              | *                               | 2                       | 2                        |
| Phone/Computer             | 5                                       | *                        | 1                                   | 3                              | *                               | 1                       | *                        |
| Technology                 | 5                                       | *                        | 2                                   | 3                              | *                               | *                       | *                        |
| Internal Aids              | 16                                      | *                        | 2                                   | 7                              | 2                               | 5                       | *                        |
| Association                | 3                                       | *                        | *                                   | 1                              | 1                               | 1                       | *                        |
| Chunking                   | 2                                       | *                        | *                                   | *                              | 1                               | 1                       | *                        |
| Visualization              | 1                                       | *                        | *                                   | *                              | *                               | 1                       | *                        |
| Environmental Modification | 10                                      | 2                        | 1                                   | 3                              | 1                               | 3                       | *                        |
| Communication Strategies   | 9                                       | *                        | 2                                   | 3                              | 1                               | 1                       | 2                        |
| Circumlocution             | 1                                       | *                        | 1                                   | *                              | *                               | *                       | *                        |
| Scripting                  | 1                                       | *                        | *                                   | *                              | *                               | 1                       | *                        |
| Communication Aids         | 1                                       | *                        | *                                   | *                              | *                               | *                       | 1                        |
| Metacognitive Strategies   | 6                                       | *                        | 2                                   | 3                              | 1                               | *                       | *                        |
| Spaced Retrieval           | 51                                      | 1                        | 7                                   | 18                             | 9                               | 13                      | 3                        |
| Errorless Learning         | 11                                      | *                        | 4                                   | 6                              | *                               | 1                       | *                        |
| Cognitive Stimulation      | 8                                       | *                        | 1                                   | 4                              | 1                               | 1                       | 1                        |
| Worksheets/iPad Apps       | 7                                       | *                        | *                                   | 4                              | 1                               | 1                       | 1                        |
| Motivational Interviewing  | 6                                       | *                        | 1                                   | 4                              | *                               | 1                       | *                        |
| Semantic Feature Analysis  | 4                                       | *                        | *                                   | 2                              | *                               | 2                       | *                        |
| Goal-Plan-Do-Review        | 4                                       | *                        | 1                                   | 2                              | *                               | 1                       | *                        |
| Attention Process Training | 2                                       | *                        | *                                   | 2                              | *                               | *                       | *                        |
| Chaining                   | 2                                       | *                        | 1                                   | *                              | *                               | 1                       | *                        |
| Life Participation         | 2                                       | *                        | *                                   | 1                              | *                               | *                       | 1                        |
| Reminiscence Therapy       | 2                                       | *                        | *                                   | *                              | 1                               | 1                       | *                        |
| Mindfulness                | 2                                       | *                        | *                                   | *                              | *                               | 1                       | *                        |
| See-Do-Review              | 1                                       | *                        | *                                   | 2                              | *                               | *                       | *                        |

|                                        |          |   |   |    |   |    |   |
|----------------------------------------|----------|---|---|----|---|----|---|
| Stop Think Plan                        | 1        | * | * | 1  | * | *  | * |
| Step-by-Step                           | 1        | * | * | *  | * | 1  | * |
| Read Attentively Summarize Review      | 1        | * | * | *  | * | 1  | * |
|                                        |          |   |   |    |   |    |   |
| <i>Functional Interventions</i>        | 40 (33%) | 2 | 5 | 17 | 5 | 10 | 1 |
| ADLs                                   | 16       | * | 1 | 5  | 3 | 6  | 1 |
| Daily Routines                         | 7        | * | * | 2  | 2 | 2  | 1 |
| Medication Management                  | 7        | * | 1 | 1  | 1 | 4  | * |
| Scheduling/Appointments                | 5        | * | * | 2  | * | 3  | * |
| Financial Management                   | 2        | * | * | *  | * | 2  | * |
| Orientation                            | 4        | 2 | * | 2  | * | *  | * |
| Safety                                 | 4        | * | 2 | *  | * | 2  | * |
| Home Exercise Program                  | 2        | * | * | 2  | * | *  | * |
|                                        |          |   |   |    |   |    |   |
| <i>Cognitive-Communication Domains</i> | 36 (29%) | * | 7 | 11 | 7 | 10 | 1 |
| Memory                                 | 28       | * | 6 | 8  | 2 | 7  | 1 |
| Naming/Word-Finding                    | 3        | * | * | *  | 2 | 1  | * |
| Executive Functions                    | 9        | * | 1 | 3  | 2 | 3  | * |
| Problem-Solving/Reasoning              | 4        | * | * | 1  | 1 | 2  | * |
| Sequencing                             | 4        | * | * | *  | 2 | 2  | * |
| Organization                           | 2        | * | * | 2  | * | *  | * |
| Attention                              | 5        | * | 2 | 2  | 1 | *  | * |
| Divided                                | 1        | * | * | *  | 1 | *  | * |
|                                        |          |   |   |    |   |    |   |
| <i>Counseling+ Activities</i>          | 34 (28%) | 2 | 5 | 18 | 2 | 3  | 4 |
| Education                              | 20       | 1 | 4 | 12 | 1 | 2  | * |
| Caregiver                              | 7        | * | 3 | 3  | 1 | *  | * |
| Patient                                | 7        | * | 1 | 2  | 1 | 1  | * |
| Caregiver Training                     | 12       | 1 | 2 | 5  | 1 | 1  | 2 |
| Awareness                              | 2        | * | * | *  | * | *  | 2 |
|                                        |          |   |   |    |   |    |   |
| <i>Assessment</i>                      | 4 (3%)   | * | * | 2  | 1 | 1  | * |

*Note.* This table summarizes the qualitative analysis of SLP response to section II, question 10b; SNF= Skilled Nursing Facility; ADLs = Activities of Daily Living.
