# Supplementary material
Source: publisher figshare collection journal article supplement (https://asha.figshare.com/articles/dataset/_/19787728)
Supplement: Supplementary file 4 [file 1]

**Supplemental Material S3.** Mild cognitive impairment or early-stage dementia formal training.

| <b>Domains and Subdomains</b>  | <b>Overall<br/>(N = 73)</b> | <b>Overall Breakdown by Years of Experience</b> |                               |                               |                                 |                               |
|--------------------------------|-----------------------------|-------------------------------------------------|-------------------------------|-------------------------------|---------------------------------|-------------------------------|
|                                |                             | <b>0–2 years<br/>(n = 8)</b>                    | <b>3–5 years<br/>(n = 15)</b> | <b>6–10 years<br/>(n = 7)</b> | <b>11–20 years<br/>(n = 12)</b> | <b>21+ years<br/>(n = 31)</b> |
| <i>Continuing Education</i>    | 47 (66%)                    | 2                                               | 6                             | 5                             | 10                              | 25                            |
| Workshop                       | 13                          | *                                               | 1                             | *                             | 4                               | 8                             |
| Course                         | 11                          | 1                                               | 1                             | 1                             | 3                               | 5                             |
| Training/Certification         | 10                          | 1                                               | 3                             | 2                             | 2                               | 2                             |
| Conference                     | 3                           | *                                               | *                             | *                             | *                               | 3                             |
|                                |                             |                                                 |                               |                               |                                 |                               |
| <i>Graduate School</i>         | 19 (27%)                    | 6                                               | 6                             | 1                             | 2                               | 5                             |
| Course                         | 9                           | 4                                               | *                             | *                             | 2                               | 3                             |
| Specified Course               | 1                           | 1                                               | *                             | *                             | *                               | *                             |
|                                |                             |                                                 |                               |                               |                                 |                               |
| <i>Job Training/Mentorship</i> | 6 (10%)                     | *                                               | 3                             | 2                             | 1                               | 1                             |
|                                |                             |                                                 |                               |                               |                                 |                               |
| <i>Other Training</i>          | 2 (3%)                      | *                                               | *                             | *                             | *                               | 2                             |

*Note.* This table summarizes the qualitative analysis of SLP responses to Section II, question 4a.
