# Supplementary material
Source: publisher figshare collection journal article supplement (https://asha.figshare.com/articles/dataset/_/19787728)
Supplement: Supplementary file 5 [file 1]

**Supplemental Material S2.** Cognitive-communication formal training.

| <b>Domain and Subdomains</b>   | <b>Overall<br/>(<i>N</i> = 123)</b> | <b>Overall Breakdown by Years of Experience</b> |                                      |                                       |                                        |                                      |
|--------------------------------|-------------------------------------|-------------------------------------------------|--------------------------------------|---------------------------------------|----------------------------------------|--------------------------------------|
|                                |                                     | <b>0–2 years<br/>(<i>n</i> = 20)</b>            | <b>3–5 years<br/>(<i>n</i> = 25)</b> | <b>6–10 years<br/>(<i>n</i> = 14)</b> | <b>11–20 years<br/>(<i>n</i> = 23)</b> | <b>21+ years<br/>(<i>n</i> = 41)</b> |
| <i>Graduate School</i>         | 83 (67%)                            | 20                                              | 22                                   | 11                                    | 14                                     | 16                                   |
| Course                         | 60                                  | 17                                              | 17                                   | 9                                     | 9                                      | 8                                    |
| Specified Course               | 12                                  | 6                                               | 4                                    | 1                                     | *                                      | 1                                    |
|                                |                                     |                                                 |                                      |                                       |                                        |                                      |
| <i>Continuing Education</i>    | 76 (62%)                            | 2                                               | 10                                   | 6                                     | 20                                     | 38                                   |
| Course                         | 26                                  | 1                                               | 6                                    | 1                                     | 6                                      | 12                                   |
| Workshop                       | 21                                  | *                                               | 1                                    | *                                     | 9                                      | 11                                   |
| Conference                     | 6                                   | *                                               | *                                    | *                                     | 2                                      | 4                                    |
| Training/Certification         | 5                                   | *                                               | 2                                    | 1                                     | 1                                      | 1                                    |
|                                |                                     |                                                 |                                      |                                       |                                        |                                      |
| <i>Job Training/Mentorship</i> | 5 (4%)                              | *                                               | 1                                    | 2                                     | 1                                      | 1                                    |
|                                |                                     |                                                 |                                      |                                       |                                        |                                      |
| <i>Independent Learning</i>    | 3 (2%)                              | *                                               | *                                    | 1                                     | *                                      | 2                                    |

*Note.* This table summarizes the qualitative analysis of SLP responses to section II, question 2a.
