# Supplementary material
Source: publisher figshare collection journal article supplement (https://asha.figshare.com/articles/dataset/_/19787728)
Supplement: Supplementary file 6 [file 1]

**Supplemental Material S5.** Goals for MCI or early-stage dementia from AD.

|                                        |                              | Overall Breakdown by Respondent Setting |                                     |                                |                                 |                         |                          |
|----------------------------------------|------------------------------|-----------------------------------------|-------------------------------------|--------------------------------|---------------------------------|-------------------------|--------------------------|
| Domains and Subdomains                 | Overall<br>( <i>N</i> = 129) | Acute<br>( <i>n</i> = 8)                | Inpatient Rehab<br>( <i>n</i> = 16) | Outpatient<br>( <i>n</i> = 49) | Home Health<br>( <i>n</i> = 17) | SNF<br>( <i>n</i> = 31) | Other<br>( <i>n</i> = 8) |
| <i>Named Interventions</i>             | 100 (78%)                    | 6                                       | 10                                  | 43                             | 14                              | 21                      | 6                        |
| Compensatory Strategies                | 100                          | 6                                       | 10                                  | 43                             | 14                              | 21                      | 6                        |
| External Aids                          | 54                           | 2                                       | 8                                   | 25                             | 8                               | 10                      | 1                        |
| Memory/Communication Book              | 8                            | 1                                       | *                                   | 4                              | 1                               | 2                       | *                        |
| Calendar                               | 8                            | *                                       | *                                   | 4                              | 2                               | 1                       | 1                        |
| Phone/Computer                         | 6                            | *                                       | 3                                   | 1                              | *                               | 1                       | 1                        |
| Technology                             | 4                            | *                                       | *                                   | 3                              | *                               | 1                       | *                        |
| Internal Aids                          | 15                           | *                                       | 2                                   | 6                              | 4                               | 3                       | *                        |
| Association                            | 3                            | *                                       | *                                   | 1                              | 2                               | *                       | *                        |
| Repetition                             | 2                            | *                                       | *                                   | 1                              | 1                               | *                       | *                        |
| Visualization                          | 2                            | *                                       | *                                   | *                              | 2                               | *                       | *                        |
| Communication Strategies               | 11                           | *                                       | 2                                   | 4                              | 1                               | 3                       | 1                        |
| Environmental Modification             | 8                            | *                                       | *                                   | 4                              | *                               | 4                       | *                        |
| Spaced Retrieval                       | 3                            | *                                       | *                                   | 1                              | 1                               | 1                       | *                        |
| Errorless Learning                     | 1                            | *                                       | *                                   | 1                              | *                               | *                       | *                        |
|                                        |                              |                                         |                                     |                                |                                 |                         |                          |
| <i>Cognitive-Communication Domains</i> | 82 (64%)                     | 2                                       | 9                                   | 29                             | 12                              | 25                      | 5                        |
| Memory                                 | 73                           | 2                                       | 7                                   | 29                             | 11                              | 21                      | 3                        |
| Naming/Word Finding                    | 10                           | *                                       | 1                                   | 3                              | 2                               | 3                       | 1                        |
| Working/Short-term Memory              | 10                           | *                                       | *                                   | 5                              | *                               | 5                       | *                        |
| Executive Functions                    | 33                           | *                                       | 4                                   | 10                             | 3                               | 15                      | 1                        |
| Problem-Solving/Reasoning              | 12                           | *                                       | 2                                   | 4                              | *                               | 6                       | *                        |
| Organization                           | 10                           | *                                       | 1                                   | 5                              | 1                               | 3                       | *                        |
| Sequencing                             | 10                           | *                                       | *                                   | 2                              | *                               | 7                       | 1                        |
| Attention                              | 15                           | *                                       | 1                                   | 10                             | 1                               | 3                       | *                        |
| Alternating                            | 3                            | *                                       | *                                   | 2                              | *                               | 1                       | *                        |
| Selective                              | 3                            | *                                       | *                                   | 2                              | *                               | 1                       | *                        |
| Sustained                              | 2                            | *                                       | *                                   | 1                              | *                               | 1                       | *                        |
| Divided                                | 2                            | *                                       | *                                   | 2                              | *                               | *                       | *                        |
| Language                               | 9                            | *                                       | *                                   | 2                              | 3                               | 2                       | 2                        |

|                         |          |   |    |    |   |    |   |
|-------------------------|----------|---|----|----|---|----|---|
|                         |          |   |    |    |   |    |   |
| <i>Functional</i>       | 79 (61%) | 5 | 11 | 26 | 8 | 24 | 5 |
| ADLs                    | 43       | 2 | 5  | 16 | 6 | 12 | 2 |
| Medication Management   | 17       | * | 3  | 4  | 2 | 8  | * |
| Daily Routine           | 11       | * | 2  | 1  | 2 | 3  | 1 |
| Financial Management    | 10       | * | 1  | 2  | 2 | 5  | * |
| Scheduling/Appointments | 10       | * | 1  | 5  | 2 | 1  | 1 |
| Safety                  | 18       | 2 | 4  | 1  | 1 | 9  | 1 |
| Orientation             | 9        | 1 | 2  | *  | 2 | 3  | 1 |
| Home Exercise Program   | 3        | * | *  | 2  | 1 | *  | * |
|                         |          |   |    |    |   |    |   |
| <i>Counseling+</i>      | 38 (29%) | 2 | *  | 21 | 7 | 5  | 3 |
| Education               | 19       | 2 | *  | 11 | 3 | 3  | * |
| Caregiver               | 15       | 1 | *  | 8  | 3 | 3  | * |
| Patient                 | 12       | 1 | *  | 5  | 3 | 2  | * |
| Caregiver Training      | 18       | * | *  | 10 | 3 | 2  | 3 |
| Awareness               | 6        | * | *  | 2  | 1 | 1  | 2 |
|                         |          |   |    |    |   |    |   |
| <i>Other Goals</i>      | 7 (5%)   | 3 | 1  | 1  | 1 | *  | 1 |
| Assessment              | 3        | * | 1  | 1  | 1 | *  | * |
| No Goals                | 2        | 2 | *  | *  | * | *  | * |
| Swallowing              | 1        | 1 | *  | *  | * | *  | * |
| Voice                   | 1        | * | *  | *  | * | *  | 1 |

*Note.* This table summarizes the qualitative analysis of SLP responses to section II, question 10a; SNF= Skilled Nursing Facility; ADLs = Activities of Daily Living.
