# Supplementary material
Source: publisher figshare collection journal article supplement (https://asha.figshare.com/articles/dataset/_/19787728)
Supplement: Supplementary file 7 [file 1]

## **Supplemental Material S1. Survey Codebook.**

### **Training in Cognitive-Communication (Cog-Comm)**

**Graduate School:** received training in cog-comm during graduate school or through graduate school coursework

**Course:** indicated cog-comm training occurred in a dedicated graduate school course or part of a course

**Specified Course:** indicated the name of the course in which they received cog-comm training

**Continuing Education:** received training in cog-comm through general continuing education opportunities

**Course:** indicated that continuing education included a specific course

**Conference:** indicated that continuing education included a specific conference

**Training/Certification:** indicated that continuing education included a specific training or certification program

**Workshops:** indicated that continuing education included a workshop

**Job Training/Mentorship:** indicated that they received training in cog-comm at their place of work or received mentorship from another professional experienced in cog-comm (e.g., neuropsychologist)

**Independent Learning:** indicated they received training in cog-comm via self-studying, reading journal articles, or another mode of learning that was independently led

## **Training in Mild Cognitive Impairment (MCI) or Early-Stage Dementia due to Alzheimer's Disease (AD)**

**Graduate School:** received training during graduate school or through graduate school coursework

**Course:** indicated training occurred in a dedicated graduate school course or part of a course

**Specified Course:** indicated the name of the course in which they received cog-comm training

**Continuing Education:** received training through general continuing education opportunities

**Course:** indicated that continuing education included a specific course

**Conference:** indicated that continuing education included a specific conference

**Training/Certification:** indicated that continuing education included a specific training or certification program

**Workshops:** indicated that continuing education included a workshop

**Job Training/Mentorship:** indicated that they received training at their place of work or received mentorship from another professional experienced in MCI, dementia, or aging (e.g., geriatrician)

**Independent Learning:** indicated they received training via self-studying, reading journal articles, or another mode of learning that was independently-led

## General Clinical Practices and Needs for MCI or Early-Stage Dementia

**Assessment Needs:** indicated the need for an assessment measure or methods to assess deficits, symptoms, or functioning

**Better Tests:** indicated that assessments should be more sensitive to a cognitive domain, specified to a population, standardized, normed, or formal; tests should better assist with diagnosis

**Standardized:** described that assessments should be more standardized, norm-referenced, or formal

**Sensitivity:** described that assessments should be more sensitive to a cognitive domain or to deficits of the targeted population

**More Feasible:** indicated that assessments should be more apt to a clinical environment, conditions, and expectations

**Time:** described current barriers with assessment time and/or need for assessments to be considerate of the time in clinical settings

**Cost:** described current assessments are too expensive or that future assessments should be less expensive

**Digital:** described a need for digitized assessments

**Functional Measures:** indicated for a need for functional assessments or a way to assess more functional or person-centered tasks

**Strategy Measures:** indicated assessments should consider the use of compensatory strategies in scoring or measure the use of strategies in some capacity

**Patient-Reported Outcome Measure (PROM):** indicated the need for patient-reported outcome measures or surveys or questionnaires

**Unsure:** stated that they were unsure how to answer questions and/or unsure of their needs

**Treatment Needs:** indicated need for treatment or interventions

**Standardized:** described that treatments should be more formalized, standardized, or evidence-based

**More Feasible:** described that treatments should be more apt to the clinical environment, conditions, and expectations

**Time:** described current barriers with treatment time and/or need for future treatment to be considerate of the time in clinical settings

**Cost:** described current treatment manuals and/or materials are too expensive or that future treatments should be less expensive

**Digital:** described a need for digitized treatment

**Functional:** indicated a need for treatments that are functional and/or related to the client's specific needs or daily functioning

**Compensatory:** indicated a need for treatments to include or address compensatory strategy use

**Goal Development:** indicated a need for tools to interpret assessments, support goal/treatment development, treatment justification, and/or progress monitoring

**Educational Tools:** indicated a need for tools to educate or teach patients, families, or others

**More Functional Not Otherwise Specified (NOS):** indicated a need for more functional tools but did not specify treatment or assessment tools

**Standardized Tools NOS:** indicated a need for more sensitive tools but did not specify treatment or assessment tools

**Sensitivity Tools NOS:** indicated a need for sensitive tools but did not specify treatment or assessment tools

**Cost NOS:** indicated current tools are too expensive or that future tools should be less expensive but did not specify assessment or treatment tools

**Time NOS:** indicated current barriers with time and/or need for future tools to be considerate of the time in clinical settings but did not specify assessment or treatment tools

## **Assessment Practices for Everyday Living Skills for MCI or Early-Stage Dementia**

**Interview:** indicated ADL information was gathered through interview or speaking with a stakeholder

**Caregiver:** described interview specifically occurred with a family member or caregiver

**Patient:** described interview specifically occurred with the patient

**Other Team Members:** described interview specifically occurred with another team member or through reading other team member reports

**Informal Tasks:** indicated ADL functioning was assessed through informal tasks that they created

**Medication Management Task:** task example mentioned medication, pillbox, managing medications, or other related ideas

**Financial Management Task:** task example mentioned money/financial management or other related ideas

**Cooking Tasks:** task example mentioned cooking or other related ideas

**Safety Tasks:** task example included activities related to safety or safety awareness

**Personal Care Tasks:** task example mentioned activities related to personal care (e.g., bathroom activities, use of call light, and/or grooming)

**Appointments/Scheduling Tasks:** task example mentioned appointments, calendar, scheduling, or other related ideas

**Telephone/Email Tasks:** task example described the use of telephone or email

**Shopping Tasks:** task example mentioned shopping in any form (e.g., grocery shopping)

**Observation:** indicated ADL assessment occurred by watching or observing the patient complete activities as part of their daily routine (which were not created or simulated by the therapist purposefully) or during other therapies (e.g., occupational therapy)

**Performance-Based Measure:** indicated ADL assessment occurred with the use of a performance-based measure or part of a performance-based measure; these types of assessments require the patient to perform a task

**Assessment of Language-Related Functional Activities (ALFA):** described use of the ALFA as a measurement tool for ADLs (Baines et al., 1999)

**Allen's Cognitive Levels Screen:** described use of the Allen's screen as a measurement tool for ADLs (Allen & Blue, 1998)

**Assessment of Motor and Process Skills (AMPS):** described use of the AMPS as a measurement tool for ADLs (Fisher, 1995)

**Communication Activities of Daily Living (CADL):** described use of the CADL as a measurement tool for ADLs (Holland, et al., 1999)

**Cognitive Linguistic Quick Test (CLQT):** described use of the CLQT as a measurement tool for ADLs (Helm-Estabrooks, 2001)

**Functional Standardized Touchscreen Assessment of Cognition (F-STAC):** described use of the F-STAC as a measurement tool for ADLs (Cognitive Innovations, 2021)

**Ross Information Processing Assessment (RIPA):** described use of the RIPA as a measurement tool for ADLs (Ross-Swain, 1996)

**Scales of Cognitive and Communication Ability for Neurorehabilitation (SCCAN):** described use of the SCCAN as a measurement tool for ADLs (Milman & Holland, 2012)

**Texas Functional Living Scale (TFLS):** described use of the TFLS as a measurement tool for ADLs (Cullum et al., 2009)

**Woodcock Johnson:** described use of the Woodcock Johnson as a measurement tool for ADLs (Schrack et al., 2014)

**Informal Questionnaire:** indicated that ADL information was gathered through a set of questions (e.g., survey, questionnaire) that they developed but no formal or published form was identified

**Team Collaboration:** indicated specific collaboration with rehabilitation team members to assess ADL functioning which goes beyond the passive observation of tasks

**Published Survey:** indicated that ADL assessment used all or a portion of a published set of questions to assist with the identification of needs. This includes self-reported, observer-reported and clinician-reported measures.

**American Speech-Language-Hearing Association Functional Assessment of Communication Skills for Adults (ASHA FACS):** described use of the ASHA FACS as a measurement tool for ADLs (Frattali et al., 2017)

**Functional Independence Measure (FIM):** described use of the FIM as a measurement tool for ADLs (Uniform Data Set for Medical Rehabilitation, 1996)

**Informant Questionnaire on Cognitive Decline in the Elderly (IQCODE):** described use of the IQCODE as a measurement tool for ADLs (Jorm, 2004)

**Lawton Instrumental Activities of Daily Living Scale (Lawton IADL):** described use of the Lawton IADL as a measurement tool for ADLs (Graf, 2008)

**Multifactorial Memory Questionnaire (MMQ):** described use of the MMQ as a measurement tool for ADLs (Troyer & Rich, 2018)

## **Reasons for No Assessment Practices for Everyday Living Skills**

**Occupational Therapy Scope:** indicated that ADL assessment is the responsibility of the occupational therapist

**Not Appropriate:** indicated that ADL assessment is not appropriate for participant setting

**Limited Knowledge:** indicated they have limited knowledge or no appropriate tools to assess ADLs

## Goals for MCI or Early-Stage Dementia due to AD

**Named Interventions:** indicated any type of intervention as part of their goal

**Compensatory Strategies:** described the use of a strategy, compensatory strategy, or indicated a specific internal or external aid

**External Aids:** described external aids or indicated a specific external aid

**Memory/Communication Book:** described memory and/or communication book and/or page

**Calendar:** described use of a calendar, planner, or other scheduling aid

**Phone/Computer:** described use of a phone, computer, or tablet

**Technology:** described technology as an external aid but did not specify what type of technology

**Internal Aids:** described internal aids or indicated a specific internal aid

**Association:** described use of association as a strategy

**Repetition:** described use of repetition or rehearsal as a strategy

**Visualization:** described use of visualization as a strategy

**Communication Strategies:** described communication strategies broadly

**Environmental Modification:** described adapting or modifying the clients' environment as a strategy

**Spaced Retrieval:** described using spaced retrieval

**Errorless Learning:** described using errorless learning

**Cognitive-Communication Domains:** described a cog-comm domain; this code and subsequent level codes were only applied if the cog-comm domain was specified; researchers did not assume domains if it was not explicitly identified

**Memory:** described memory or recall broadly, or listed a specific type of memory

**Naming/Word Finding:** described naming or word-finding

**Working/Short-term Memory:** described working memory or short-term memory

**Executive Functions:** described executive functions broadly or listed a specific function

**Problem-Solving/Reasoning:** described problem-solving/reasoning

**Organization:** described organization

**Sequencing:** described sequencing

**Attention:** described attention broadly or listed a specific type of attention

**Alternating:** described alternating attention

**Selective:** described selective attention

**Sustained:** described sustained attention

**Divided:** described divided attention

**Language:** described language broadly

**Functional:** described functional or client-centered goals

**ADLs:** described basic or independent activities of daily living

**Medication Management:** goal example mentioned medication, pillbox, managing medications, or other related ideas

**Daily Routine:** goal example mentioned routines, activities found in daily routines of the client, or other related ideas

**Money Management:** goal example mentioned money/financial management or other related ideas

**Scheduling/Appointments:** goal example mentioned appointments, calendar, scheduling, or other related ideas

**Safety:** described safety or safety awareness

**Orientation:** described time, and/or general orientation

**Home Exercise Program:** described the creation of, completion of, or general mention of home exercise program

**Counseling+:** described activities related to counseling, collaboration, prevention, and wellness (Lanzi, Ellison, & Cohen, 2021)

**Education:** described education or teaching

**Caregiver:** described education was provided to family or caregiver

**Patient:** described education was provided to the patient

**Caregiver Training:** described goals directed towards caregiver training to improve functioning, participation, or communication

**Awareness:** described the awareness of deficits

**Other Goals:** described other goals not related to the other established codes

**Assessment:** described goals that address and/or complete continued assessment or staging

**No Goals:** stated they do not create any goals

**Swallowing:** described swallowing function

**Voice:** described voice function

## **Treatment for MCI or Early-Stage Dementia due to AD**

**Named Interventions:** described any type of intervention

**Compensatory Strategies:** described the use of a strategy, compensatory strategy, or indicated a specific internal or external aid

**External Aids:** described external aids or indicated a specific external aid

**Memory Book:** described memory book and/or page

**Calendar:** described use of a calendar, planner, or other scheduling aid

**Phone/Computer:** described use of a phone, computer, or tablet

**Technology:** described technology as an external aid but did not specify what type of technology

**Internal Aids:** described internal aids or indicated a specific internal aid

**Association:** described use of association as a strategy

**Repetition:** described use of repetition or rehearsal as a strategy

**Visualization:** described use of visualization as a strategy

**Communication Strategies:** described communication strategies broadly

**Circumlocution:** described use of circumlocution as a strategy

**Scripting:** described use of or teaching scripts or scripting as a strategy

**Communication Aids:** described use of communication aids as a strategy

**Metacognitive Strategies:** described use of metacognitive strategies

**Environmental Modification:** described adapting or modifying the clients' environment as a strategy

**Spaced Retrieval:** described spaced retrieval

**Errorless Learning:** described errorless learning

**Cognitive Stimulation:** described cognitive stimulation or other isolated restorative cognitive approaches

**Worksheets/iPad Apps:** described use of worksheets or apps to stimulate cognition or to address cognitive functioning

**Motivational Interviewing:** described motivational interviewing

**Semantic Feature Analysis:** described semantic feature analysis

**Goal-Plan-Do-Review:** described goal-plan-do-review

**Attention Process Training:** described attention process training

**Chaining:** identified chaining

**Life Participation:** described using the life participation approach or approach similar to life participation approach for aphasia

**Reminiscence Therapy:** described reminiscence therapy

**Mindfulness:** described use of mindfulness, mind-body connection, or meditative techniques

**See-Do-Review:** described see-do-review

**Stop Think Plan:** described stop think plan

**Step-by-Step:** described step-by-step

**Read Attentively Summarize Review:** described read attentively summarize review

**Functional:** described functional or person-centred approaches

**ADLs:** described basic or independent activities of daily living

**Daily Routine:** task example mentioned routines or activities found in daily routines of client

**Medication Management:** task example mentioned medication, pillbox, or managing medications

**Scheduling/Appointments:** task example mentioned appointments, calendar, scheduling, or prospective memory

**Financial Management:** task example mentioned money or financial management

**Safety:** described safety or safety awareness

**Orientation:** described time, and/or general orientation

**Home Exercise Program:** described the creation of, completion of, or general mention of home exercise program

**Cognitive-Communication Domains:** described a cog-comm domain; this code and subsequent level codes were only applied if the cog-comm domain was specified; researchers did not assume domains if it was not explicitly identified

**Memory:** described memory or recall broadly, or listed a specific type of memory

**Naming/Word Finding:** described naming or word-finding

**Executive Functions:** described executive functions broadly or listed a specific function

**Problem-Solving/Reasoning:** described problem-solving/reasoning

**Organization:** described organization

**Sequencing:** described sequencing

**Attention:** described attention broadly or listed a specific type of attention

**Divided:** described divided attention

**Counseling+:** described activities related to counseling, collaboration, prevention, and wellness (Lanzi, Ellison, & Cohen, 2021)

**Education:** described education or teaching

**Caregiver:** described education was provided to family or caregiver

**Patient:** described education was provided to the patient

**Caregiver Training:** described goals directed towards caregiver training to improve functioning, participation, or communication

**Awareness:** described treating awareness of deficits

**Assessment:** described that their treatment addressed continuation of assessment or staging
